# Supplementary material for: Oligomannan Prebiotic Attenuates Immunological, Clinical and Behavioral Symptoms in Mouse Model of Inflammatory Bowel Disease
Source: PubMed Central journal article supplement (PMC5034233; doi:10.1038/srep34132), 2016-09-23
Supplement: srep34132-s1.pdf [file srep34132-s1.pdf]

Supplement to „Oligomannan Prebiotic Attenuates Immunological, Clinical and Behavioral Symptoms in Mouse Model of Inflammatory Bowel Disease”

by Szilamér Ferenczi<sup>1</sup>, Krisztián Szegi<sup>1</sup>, Zsuzsanna Winkler<sup>1</sup>, Teréz Barna<sup>2</sup> and Krisztina J. Kovács<sup>1\*</sup>

<sup>1</sup> Laboratory of Molecular Neuroendocrinology, Institute of Experimental Medicine, Budapest, Hungary and <sup>2</sup> Department of Genetics and Applied Biochemistry, University of Debrecen, Debrecen, Hungary

**Primer sequences used in qRT PCR reactions**

|                                                                                  |
|----------------------------------------------------------------------------------|
| GAPDH: f: TGA CGT GCC GCC TGG AGA AA, r: AGT GTA GCC CAA GAT GCC CTT CAG         |
| IL-1b f: GCCTCGTGCTGTCGGACCCA , r: TGAGGCCCAAGGCCACAGGT                          |
| IL-1a: f: CCA TAA CCC ATG ATC TGG AAG AG, r: GCT TCA TCA GTT TGT ATC TCA AAT CAC |
| TNFa: f: CAG CCG ATG GGT TGT ACC TT, r: GGC AGC CTT GTG CCT TGA                  |
| MCP-1: f: CCAGCACCAGCACCAGCCAA, r: TGGATGCTCCAGCCGGCAAC                          |
| IL-6 f: CTCTGCAAGAGACTTCCATCC, r: AGTCTCCTCTCCGGACTTGT                           |
| G-CSF f: TGCCCAGAGGGCGCATGAAGC, r: GGGGAACGGCCTCTCGTCCT                          |
| Arginase-1 f: GTCTGGCAGTTGGAAGCATCT, r: GCATCCACCCAAATGACACA                     |
| TLR2 f:AACCTCAGACAAAGCGTCAA, r: TCCTGAGCAGAACAGCGTTT                             |
| TLR4 f: TCCCTGCATAGAGGTAGTTCCTA, r: TTCAAGGGGTGAAGCTCAGA                         |
| TLR7 f: TGGCTCCCTTCTCAGGATGA, r: GTGTCCACATCGAAAACACCATT                         |
| TLR9 f: GAGAGACCCTGGTGTGGAAC, r: CCTTCGACGGAGAACCATGT                            |
| NALP3 f: CAGAGCCTACAGTTGGGTGAA, r: ACGCCTACCAGGAAATCTCG                          |
| NALP6 f:CTCTCCGTGTCAGCGTTCAA, r:AGCGAGCATTCCTCTCCTTC                             |
| IL-10 f: AGTGAGAAGCTGAAGACCCTCAGG, r: TTCATGGCCTTGTAGACACCTGGT                   |
| IL-17 f: CCTGGCGGCTACAGTGAAG, r: GGAAGTCCTTGGCCTCAGTGT                           |
| KC f: GAGCTGCGCTGTCAGTGCCT, r: CAAGGCAAGCCTCGCGACCA                              |
| CX3CL1 f:CCGCGTTCTTCCATTTGTGT, r:GGTCATCTTGTGCGCACATGATT                         |
| MUC2 f: GCTGACGAGTGGTTGGTGAATG, r: GATGAGGTGGCAGACAGGAGAC                        |
